# Supplementary material
Source: ML conference proceedings conference paper supplement (https://openreview.net/forum?id=bAxUA5r3Ss)
Supplement: supplementary_material [file attachment]

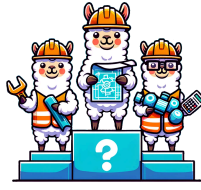

# TaskBench

Stars 23k License Apache 2.0 arXiv Paper Dataset

## Benchmarking Large Language Models for Task Automation

Hosted on Hugging Face: [microsoft/Taskbench](#)  
Croissant metadata: [metadata.json](#)

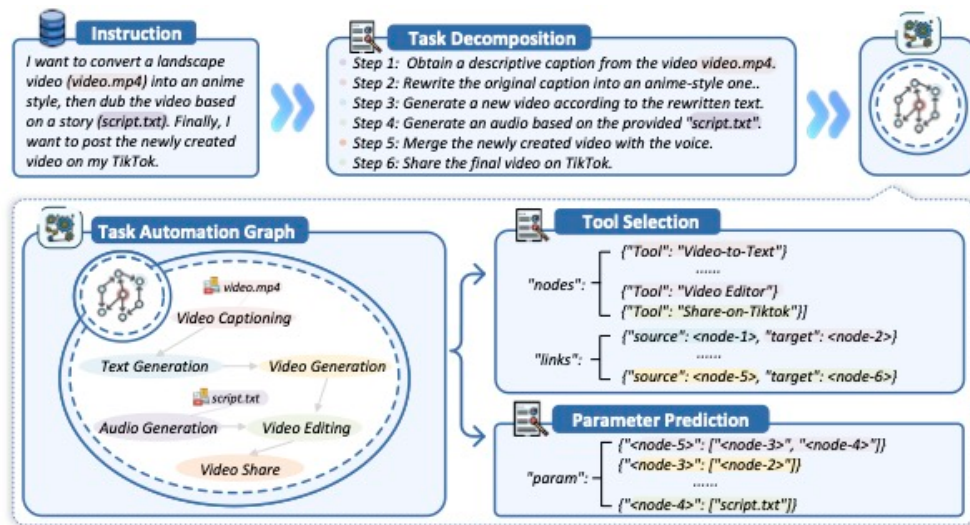

## Table of Contents

- [Table of Contents](#)
- [Introduction](#)
  - [Metadata](#)
  - [Author Statement](#)
  - [Dataset Distribution](#)
- [Dataset](#)
  - [Introduction](#)
  - [Processing Statistics](#)
  - [Prompts for Dataset Construction](#)
- [Evaluation with TaskBench](#)
  - [Setup](#)
  - [Inference](#)
  - [Evaluation](#)

- [Reproduce the Leaderboard](#)
- [Dataset Construction with Back-Instruct](#)
  - [Construct Your Own Tool Graph](#)
  - [Generate the Dataset](#)
- [Leaderboard](#)
  - [Multimedia Tools Domain](#)
  - [HuggingFace Tools Domain](#)
  - [Daily Life APIs Domain](#)

## Introduction

---

TaskBench is a benchmark for evaluating large language models (LLMs) on task automation. Task automation can be formulated into three critical stages: task decomposition, tool invocation, and parameter prediction. This complexity makes data collection and evaluation more challenging compared to common NLP tasks. To address this challenge, we propose a comprehensive evaluation framework and a high-quality dataset for task automation. We also provide a leaderboard of 17 LLMs on TaskBench, including GPT-4, Claude-2, and other open-source LLMs.

## Metadata

- **URL:** [TaskBench](#)
- **Croissant metadata:** [metadata.json](#)
- **Version:** 1.0.0
- **License:** Apache-2.0
- **Dataset Size:** 17,331
- **Responsible AI (RAI) metadata**
  - **Data collection:** The data for TaskBench has been generated by the proposed method called Back-Instruct. This approach involves creating a 'tool graph' which represents user intent, and then simulating user instructions and annotations. This is a three-stage process involving tool graph construction, graph sampling, and then back-instruction where the sampled tool graph is used to generate the task steps and instruction. Two verification processes are used to maintain the quality of the dataset: rule-based critics and LLM -based critics, both of which check alignment between the generated data and the sampled tool graph. The final dataset is further verified by human annotators.
  - **Data biases:** There could be biases in the dataset; for example, the tool graph may not represent all possible combinations of tools and dependencies and is limited by the initial tool library. Also, the analysis and selection of nodes and edges might be biased. In addition, there might be biases in the human annotations, as they depend on the individual perspectives and understanding of the annotators.
  - **Personal sensitive information:** The TaskBench dataset does not contain personal or sensitive information. The dataset was synthesized for the purpose of benchmarking Large Language Models in task automation and does not involve user-provided information. However, users of TaskBench

should acknowledge the importance of not using the model to generate or disclose personal or sensitive information. The focus should remain on generating practical and general solutions for task automation. The instructions provided for generating data emphasize clarity, practicality, and non-specificity to individual users' information.

## Author Statement

The authors of the TaskBench dataset bear all responsibility in case of violation of rights, privacy, or any other issues that may arise from the use of the dataset. The dataset is provided under the Apache-2.0 license, and users are required to comply with the terms of this license when using the dataset. The authors have taken all necessary steps to ensure that the dataset is free of personal or sensitive information and that it is suitable for benchmarking Large Language Models in task automation. Users of the dataset should acknowledge the license terms and use the dataset responsibly for research purposes only.

## Dataset Distribution

The TaskBench dataset is hosted on the Hugging Face Datasets platform ([TaskBench](#)), where it is available for download and use by researchers and developers. The dataset is provided under the Apache-2.0 license, and users are required to comply with the terms of this license when using the dataset. The dataset is maintained by the authors, who will ensure that it remains available for research purposes and that any updates or changes to the dataset are communicated to users in a timely manner.

## Dataset

---

To generate high-quality evaluation datasets, we introduce the concept of Tool Graph to represent the decomposed tasks in user intent, and adopt a Back-Instruct method to simulate user instruction and annotations. The data collection process consists of three stages:

- **Tool Graph Construction:** we first build a tool library and use the tool library to construct the tool graph. The nodes in the tool graph represent the tools, and the edges represent the dependencies between the tools, including the resource dependency and temporal dependency.
- **Graph Sampling:** we sample the tool graph to generate the tool graph for each sample. The sampled tool graph is used to generate the tool invocation graph and the instruction. According to the topology of the sampled tool graph, we sample the tool graph in three ways: node, chain and DAGs, which represent different structures of task decomposition for task automation.
- **Back-Instruct:** we first use the sampled tool graph to generate the task steps and the instruction. Then, we use the instruction to generate the tool invocation parameters to complete the tool invocation graph.

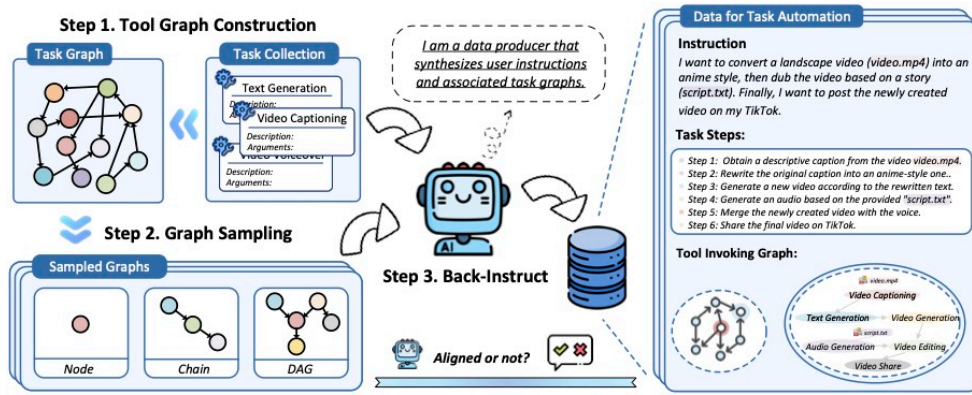

To improve the quality of the dataset, we use LLM-based and rule-based critics to verify the dataset. The former aims to use LLM to check the alignments between the generated data and the sampled tool graph. While the latter uses straightforward rules to determine the alignment between the tool graphs in created data and the sampled tool graphs. Here, we use the nodes and edges of the sampled graph to determine the consistency. Details statistics of the processing are shown in [the table](#).

After LLM-based and rule-based critics, we further verify the dataset with human annotators, including checking the syntax of the instructions, the correctness of the tool invocation graph, and the correctness of the tool invocation parameters. The final dataset contains 28,271 samples in three domains: HuggingFace Tools, Multimedia Tools, and Daily Life APIs. Details statistics of the human verification are shown in [the table](#).

## Introduction

The TaskBench dataset contains datasets in three areas: HuggingFace Tools, Multimedia Tools, and Dailylife APIs. Each dataset directory includes three files:

- `data.json`: the dataset file, which contains the samples in the dataset.
- `graph_desc.json`: the tool graph description file, which contains the tool graph of the dataset.
- `user_requests.json`: contains the user requests of the dataset.
- `tool_desc.json`: the tool description file, which contains the tool descriptions of the dataset.

```

└─data_dailylifeapis
  |   data.json
  |   graph_desc.json
  |   user_requests.json
  |   tool_desc.json
  |
└─data_huggingface
  |   data.json
  |   graph_desc.json
  |   user_requests.json
  |   tool_desc.json
  |
└─data_multimedia
  |   data.json
  |   graph_desc.json
  |   user_requests.json
  |   tool_desc.json

```

## Processing Statistics

We provide the statistics of the dataset processing in the following tables:

- Overview:** we provide the number of samples in each dataset, the number of samples checked by critics, and the number of samples verified by humans. Grouped by the tool invocation graph structure, e.g. node, chain, and DAGs, we also provide the number of samples in each group.
- LLM-based and Rule-based Critics:** we provide the number of samples checked by LLM-based critics, rule-based critics and both critics.
- Human Verification:** Human verification is built on the samples checked by critics, which includes three parts: syntax checking, instruction checking, and tool invocation graph checking. We provide the number of samples in each part, and along with the number of samples that are discarded or fixed.

| Dataset                   | #Samples | #Samples<br>Checked by<br>Critics (%)   | #Samples<br>Verified by<br>Humans (%)    | Node                               | Chain | DAG |
|---------------------------|----------|-----------------------------------------|------------------------------------------|------------------------------------|-------|-----|
| Hugging<br>Face<br>Models | 12,217   | 8,457<br>(69.22%)                       | 7,458<br>(61.76%)                        | 3,067                              | 3,642 | 837 |
| Multimedia<br>Tools       | 8,904    | 6,281<br>(70.54%)                       | 5,555<br>(62.71%)                        | 2,037                              | 2,982 | 565 |
| Dailylife<br>APIs         | 7,150    | 5,432<br>(75.97%)                       | 4,318<br>(60.42%)                        | 1,258                              | 2,787 | 275 |
| Dataset                   | #Samples | #Checked by<br>LLM-based<br>Critics (%) | #Checked by<br>Rule-based<br>Critics (%) | #Checked by<br>Both Critics<br>(%) |       |     |

|                     |        |                |                 |                |
|---------------------|--------|----------------|-----------------|----------------|
| Hugging Face Models | 12,217 | 9,042 (74.01%) | 10,289 (84.22%) | 8,457 (69.22%) |
| Multimedia Tools    | 8,904  | 6,959 (78.16%) | 7,363 (82.69%)  | 6,281 (70.54%) |
| Dailylife APIs      | 7,150  | 5,694 (79.63%) | 6,271 (87.70%)  | 5,432 (75.97%) |

| Dataset             | #Samples Checked by Critics | #Correct Samples (%) | #Discarded (%) | #Fixed for Syntax (%) | #Fixed for Instructions (%) | #Fixed for Tool Invocation Graph (%) |
|---------------------|-----------------------------|----------------------|----------------|-----------------------|-----------------------------|--------------------------------------|
| Hugging Face Models | 8,457                       | 6,974 (82.46%)       | 911 (10.77%)   | 27 (0.32%)            | 328 (3.87%)                 | 843 (9.96%)                          |
| Multimedia Tools    | 6,281                       | 5,262 (83.77%)       | 697 (11.09%)   | 11 (0.17%)            | 107 (1.70%)                 | 526 (9.96%)                          |
| Dailylife APIs      | 5,432                       | 4,307 (79.29%)       | 714 (13.14%)   | 6 (0.11%)             | 92 (1.68%)                  | 332 (6.11%)                          |

## Prompts for Dataset Construction

### 1. **Back Instruct:** Given sampled tool graph, generate task steps and instruction.

Given a tool graph with tools as nodes, and invoking chains between tools as edges. The following tools (nodes) are available with their corresponding descriptions and input/outputs types:

Node 1:{"id": "Image-to-Image", "desc": "Image-to-image is the task of transforming a source image to match the characteristics of a target image or a target image domain. Any image manipulation and enhancement is possible with image to image models.", "input-type": ["image"], "output-type": ["image"]}

Node 2:{"id": "Image-Enhancement", "desc": "Image enhancement is the process of adjusting digital images to improve their quality or make them more visually appealing. It can involve adjusting brightness, contrast, sharpness, and color balance.", "input-type": ["image"], "output-type": ["image"]}

..... These tools can be connected as follows (the directed edges are invoking chains among tools):

Edge: Image-to-Image -> Image-Enhancement

..... Based on the above tool graph, please be skillful to generate the according task steps, user request and tool invoking graph.

Requirements:

- the generated user request should be somewhat clear, self-contained (user-specified text, image, video, audio, content should be contained in the request) and practical (help users solve a practical problem);
- the task steps must be strictly aligned with the tool graph (nodes and edges) and reasonable, the tool invoking graph must align with task steps, also with the given tool graph;
- the user request just can be decomposed into task steps solved by the tool invoking graph;
- each task step corresponds to a tool node in the tool graph and tool invoking graph, and the number of task steps must be same with the nodes. Each tool node can only be used once;
- if need image/audio/video

resources in user request, please use files 'example.[jpg/mp4/wav/png]'; \n6. the dependencies among task steps must align with the edges of tool graph and tool invoking graph; \n7. the number and types of tool parameters in the generated tool invoking graph need to be consistent with the pre-defined input/outputs types of the tools. \nNow please generate your result (with random seed {seed}) in a compact JSON format:\n {"task\_steps": [ step description of one or more steps ], "user\_request": "your high-quality and self-contained synthesized request", "invoking\_graph": {"nodes": [{"id": "tool name", "input": [ either user-specified text or resource file 'example.[jpg/mp4/wav/png]' ] in the above user request, or the dependent tool name whose output is required by this node ]}, {"links": [{"source": "tool name i", "target": "tool name j"}]}}

2. **LLM-based Critic:** Check the correctness of the task steps, user request, and tool invoking graph.

```
{"task_steps": [ step description of one or more steps ], "user_request": "your high-quality and self-contained synthesized request", "invoking_graph": {"nodes": [{"id": "tool name", "input": [ either user-specified text or resource file 'example.[jpg/mp4/wav/png]' ] in the above user request, or the dependent tool name whose output is required by this node ]}, {"links": [{"source": "tool name i", "target": "tool name j"}]}, "check_by_teacher": "This field is filled by your strict and well-trained teacher, minor mistakes are complete intolerable to him. He evaluated whether your synthesized user request, tool invoking graph are valid and whether they are aligned with the given tool graph (strictly checked step by step according to the above requirements). Some comments from him place here (start with 'Let me check your result step by step, and evaluate the 'Executable' and 'Correct' of the tool invoking graph (Executable means that the tool invoking graph executed successfully, regardless of alignment with the given tool graph. While Correct implies that the tool invoking graph are not only 'Executable' but also strictly consistent (with strictly same nodes and same edges) with the given tool graph). After carefully evaluating, found some mistakes:' and end with a conclusion: 'Conclusion: Executable: no/yes, Correct: no/yes!.)'}}
```

## Evaluation with TaskBench

On top of the TaskBench dataset, we provide a comprehensive evaluation framework for task automation. The evaluation framework consists of three stages: task decomposition, tool invocation, and parameter prediction. We provide the evaluation metrics for each stage:

- **Task Decomposition:** Since task steps are diverse text distributions, we use the Rouge-1 (R1), Rouge-2 (R2), and Bertscore F1 (BsF) metrics to evaluate the task decomposition results.
- **Tool Invocation:** We report the F1 of node prediction (n-F1) and edge prediction (e-F1) in the tool invocation graph to evaluate the tool invocation results. Edge prediction reflects the correctness of the dependencies between tools, while node prediction reflects the correctness of the tool prediction.
- **Parameter Prediction:** For tool parameters prediction, we report the parameter type (or name) F1 (t-F1) and parameter value F1 (v-F1).

To evaluate the task automation performance of LLMs on TaskBench we provide the evaluation code and data, please follow the instructions below:

## Setup

```
conda create -n taskbench python=3.8
conda activate taskbench
pip install -r requirements.txt
```

Additionally, if you wish to evaluate open-source large language models, you will also need to deploy the LLMs locally using an **OpenAI-compatible API**. We recommend using the `fastchat` tool to deploy the service to the `localhost:8000` endpoint.

```
pip install fastchat
pip install vllm
pip install "fastapi[all]"

python3 -m fastchat.serve.controller
python3 -m fastchat.serve.vllm_worker --model-path lmsys/vicuna-7b
python3 -m fastchat.serve.openai_api_server --host localhost --por
```

## Inference

For convenience, it is recommended to deploy all LLMs to the same endpoint, such as `localhost:8000`. To generate the prediction file on TaskBench, specify the name of the LLM using the following command:

```
python inference.py \
  --llm gpt-4 \
  --data_dir data_multimedia \
  --temperature 0.2 \
  --top_p 0.1 \
  --api_addr localhost \
  --api_port 8000 \
  --multiworker 5 \
  --use_demos 0 \
  --reformat true \
  --reformat_by self \
  --log_first_detail true \
  --use_demos 2 \
  --dependency_type resource \
  --tag true
```

## Evaluation

With the predictions in place, you can now evaluate the LLMs. The predictions file is saved by default in the dataset's folder under the name `predictions`. Execute the following command to calculate the evaluation metrics (saved in the `metrics` folder):



```
python evaluate.py \  
  --data_dir data_multimedia \  
  --prediction_dir $prediction_dir \  
  --llm gpt-4 \  
  --splits all \  
  --n_tools all \  
  --mode add \  
  --dependency_type resource \  
  -m all
```

## Reproduce the Leaderboard

To reproduce the leaderboard in Multimedia Tools domain, you can use the script `run_leaderboard.sh`. The script will evaluate the performance of each LLM. The results will be saved in the `metrics` folder.

```
./run_leaderboard.sh data_multimedia predictions 3
```

## Dataset Construction with Back-Instruct

---

We have provided the dataset for three domains: Hugging Face Tools (`data_huggingface`), Multimedia Tools (`data_multimedia`), and Daily Life APIs (`data_dailylifeapis`). If you want to generate your own dataset, please follow the instructions below:

### Construct Your Own Tool Graph

First, you need to build your own tool library. The tool library is a JSON file that contains the description of the tools and tool parameters. Two formats of the tool are supported:

```

// Tool with type-specific parameters
{
  "id": "Image-to-Image",
  "desc": "Image-to-image is the task of transforming a source imc
  "input-type": [
    "image"
  ],
  "output-type": [
    "image"
  ]
}
// API with request parameters
{
  "id": "send_sms",
  "desc": "Send an sms to a specific phone number",
  "parameters": [
    {
      "name": "phone_number",
      "type": "string",
      "desc": "The phone number to send the sms to"
    },
    {
      "name": "content",
      "type": "string",
      "desc": "The content of the sms"
    }
  ]
}

```

Then based on the tool library, you can use the script `generate_graph.py` to generate the tool graph. Now we support two type of tool graph: resource dependency graph and temporal dependency graph. For type-specific parameters, we use the resource dependency graph. For API with request parameters, we use the temporal dependency graph. You can specify the tool graph type by the parameter `--dependency_type`. In the future, we will support more types of tool graphs.

```

python generate_graph.py \
  --tool_desc tool_desc.json \
  --dependency_type resource \
  --data_dir data_multimedia

```

Note: The auto-generated tool graph may not be perfect. You can manually modify the tool graph to make it more reasonable. You can check the tool graph through the visualization tool `visualize_graph.py`. We recommend that you manually create the tool graph thoroughly, which will help you to generate a high-quality dataset.

## Generate the Dataset

After generating the tool graph, you can use the script `data_engine.py` to generate the dataset. You need to specify the tool graph description file to `--graph_desc` and the tool description file to `--tool_desc`.

```
# specify the graph and tool description file
python data_engine.py \
    --graph_desc data_multimedia/graph_desc.json \
    --tool_desc data_multimedia/tool_desc.json \
    --llm gpt-4 \
    --temperature 1.0 \
    --top_p 1.0 \
    --dependency_type resource \
    --save_figure false \
    --api_addr localhost \
    --api_port 8002 \
    --check true \
    --use_async true \
    --multiworker 5

python format_data.py \
    --data_dir data_multimedia \
    --dependency_type resource
```

## Leaderboard

---

Based on the evaluation framework and the TaskBench dataset, we provide a leaderboard of task automation performance of 17 LLMs. We provide the evaluation results of each LLM in the following tables:

### Multimedia Tools Domain

| LLM              | R1    | R2    | BsF   | n-F1  | e-F1  | t-F1  | v-F1  |
|------------------|-------|-------|-------|-------|-------|-------|-------|
| gpt-4            | 60.84 | 40.08 | 91.19 | 90.90 | 69.27 | 87.06 | 72.31 |
| claude-2         | 48.85 | 23.59 | 89.22 | 80.94 | 53.01 | 71.63 | 51.58 |
| gpt-3.5-turbo    | 49.66 | 28.51 | 89.54 | 72.83 | 44.02 | 65.91 | 40.80 |
| text-davinci-003 | 49.23 | 27.97 | 89.21 | 73.97 | 45.81 | 68.48 | 40.70 |
| codellama-13b    | 44.46 | 23.30 | 88.66 | 62.78 | 24.61 | 48.19 | 29.13 |
| codellama-7b     | 43.76 | 22.93 | 88.81 | 53.29 | 14.76 | 38.04 | 24.45 |
| vicuna-13b-v1.5  | 44.75 | 23.75 | 88.94 | 60.61 | 14.78 | 41.62 | 23.62 |
| nous-hermes-13b  | 35.73 | 16.11 | 87.53 | 58.97 | 8.90  | 43.60 | 21.69 |
| wizardlm-13b     | 35.87 | 17.55 | 87.29 | 51.24 | 4.82  | 39.10 | 18.74 |
| vicuna-7b-v1.5   | 39.46 | 19.83 | 88.53 | 46.06 | 4.26  | 29.72 | 13.74 |
| longchat-7b-v1.5 | 37.85 | 18.14 | 87.64 | 43.08 | 3.95  | 27.89 | 13.41 |

|                   |       |       |       |       |      |       |       |
|-------------------|-------|-------|-------|-------|------|-------|-------|
| baichuan-13b-chat | 20.41 | 3.77  | 83.31 | 42.51 | 5.19 | 28.04 | 11.77 |
| llama-2-13b-chat  | 26.16 | 7.88  | 84.82 | 43.87 | 1.63 | 29.99 | 11.32 |
| internlm-chat-7b  | 16.64 | 3.56  | 82.91 | 23.60 | 1.14 | 13.75 | 6.09  |
| llama-2-7b-chat   | 34.51 | 15.91 | 87.56 | 26.47 | 0.91 | 18.27 | 5.84  |
| mpt-7b-chat       | 30.94 | 11.90 | 86.08 | 8.68  | 0.18 | 3.19  | 1.02  |
| vicuna-33b-v1.3   | 31.27 | 13.37 | 86.17 | 6.40  | 0.01 | 2.47  | 1.09  |

## HuggingFace Tools Domain

| LLM               | R1    | R2    | BsF   | n-F1  | e-F1  | t-F1  | v-F1  |
|-------------------|-------|-------|-------|-------|-------|-------|-------|
| gpt-4             | 52.42 | 30.38 | 90.12 | 81.54 | 54.70 | 77.31 | 60.86 |
| claude-2          | 44.21 | 21.12 | 88.71 | 79.00 | 43.51 | 63.00 | 43.08 |
| text-davinci-003  | 36.68 | 17.61 | 87.03 | 59.38 | 29.37 | 52.53 | 36.04 |
| gpt-3.5-turbo     | 42.99 | 21.58 | 88.47 | 69.49 | 33.36 | 55.88 | 36.32 |
| codellama-13b     | 38.75 | 18.37 | 88.32 | 53.16 | 14.64 | 32.06 | 18.87 |
| nous-hermes-13b   | 37.36 | 16.91 | 88.18 | 53.62 | 8.29  | 37.51 | 17.66 |
| wizardlm-13b      | 34.47 | 15.38 | 87.38 | 54.40 | 2.05  | 38.76 | 15.35 |
| llama-2-13b-chat  | 39.37 | 18.64 | 88.67 | 48.47 | 7.30  | 31.61 | 15.38 |
| longchat-7b-v1.5  | 27.09 | 8.97  | 85.50 | 48.18 | 0.56  | 33.57 | 13.94 |
| baichuan-13b-chat | 19.93 | 5.97  | 83.85 | 53.85 | 7.65  | 33.17 | 13.53 |
| vicuna-13b-v1.5   | 37.12 | 17.03 | 87.90 | 50.82 | 7.28  | 28.34 | 11.85 |
| vicuna-7b-v1.5    | 27.17 | 10.02 | 85.61 | 42.87 | 2.76  | 24.65 | 10.81 |
| vicuna-33b-v1.3   | 33.52 | 14.75 | 86.73 | 43.40 | 4.82  | 22.71 | 10.07 |
| codellama-7b      | 38.97 | 18.62 | 88.46 | 37.59 | 5.35  | 22.50 | 9.20  |
| internlm-chat-7b  | 20.53 | 7.16  | 83.74 | 24.39 | 0.83  | 15.41 | 6.64  |
| llama-2-7b-chat   | 24.12 | 8.68  | 85.43 | 27.30 | 0.74  | 13.05 | 2.79  |
| mpt-7b-chat       | 33.21 | 12.73 | 87.23 | 20.86 | 0.12  | 9.61  | 1.83  |

## Daily Life APIs Domain

| LLM           | R1    | R2    | BsF   | n-F1  | e-F1  | t-F1  | v-F1  |
|---------------|-------|-------|-------|-------|-------|-------|-------|
| gpt-4         | 85.07 | 72.36 | 96.91 | 96.91 | 80.53 | 97.02 | 71.14 |
| claude-2      | 82.26 | 69.88 | 96.64 | 93.52 | 75.31 | 92.71 | 64.72 |
| codellama-13b | 89.86 | 83.27 | 97.90 | 87.73 | 63.16 | 84.26 | 62.38 |

|                   |       |       |       |       |       |       |       |
|-------------------|-------|-------|-------|-------|-------|-------|-------|
| gpt-3.5-turbo     | 58.53 | 39.90 | 91.29 | 85.37 | 60.67 | 81.97 | 55.66 |
| text-davinci-003  | 68.27 | 50.30 | 93.59 | 80.42 | 54.90 | 78.37 | 53.40 |
| nous-hermes-13b   | 78.49 | 68.04 | 95.61 | 73.45 | 3.50  | 64.47 | 47.22 |
| vicuna-13b-v1.5   | 81.76 | 71.76 | 96.31 | 75.67 | 12.48 | 64.27 | 47.31 |
| wizardlm-13b      | 82.02 | 72.43 | 96.36 | 69.34 | 14.18 | 55.00 | 40.53 |
| codellama-7b      | 56.98 | 38.83 | 91.31 | 59.33 | 27.23 | 52.99 | 34.81 |
| vicuna-33b-v1.3   | 54.96 | 39.71 | 91.40 | 52.49 | 16.37 | 39.95 | 29.64 |
| vicuna-7b-v1.5    | 40.26 | 21.19 | 87.27 | 52.73 | 14.23 | 36.30 | 24.67 |
| baichuan-13b-chat | 49.43 | 27.25 | 88.32 | 52.55 | 10.61 | 37.48 | 23.77 |
| llama-2-13b-chat  | 45.39 | 22.42 | 87.74 | 55.77 | 17.02 | 35.11 | 22.94 |
| longchat-7b-v1.5  | 29.05 | 14.84 | 83.90 | 47.26 | 14.44 | 25.73 | 18.18 |
| internlm-chat-7b  | 42.94 | 21.02 | 86.14 | 29.14 | 6.63  | 19.21 | 13.48 |
| llama-2-7b-chat   | 37.06 | 16.49 | 86.31 | 30.17 | 4.27  | 14.94 | 9.34  |
| mpt-7b-chat       | 44.54 | 20.98 | 87.17 | 15.95 | 1.69  | 5.34  | 3.45  |

More details can be found in our paper: [TaskBench: Benchmarking Large Language Models for Task Automation](#).
